# Supplementary material for: A Consensus Model of Homology-Directed Repair Initiated by CRISPR/Cas Activity
Source: MDPI journal article supplement (doi:10.3390/ijms22083834), 2021-04-07
Supplement: s1 [file s1]

# *A Consensus Model of Homology-Directed Repair Initiated by CRISPR/Cas Activity*

Kevin Bloh <sup>1</sup>, Natalia Rivera-Torres <sup>1,2\*</sup>

<sup>1</sup> Affiliation 1; Gene Editing Institute, Helen F. Graham Cancer Center & Research Institute, Christiana Care Health System, 4701 OgletonStanton Road, Newark, Delaware 19710

<sup>2</sup> Affiliation 2; Department of Medical and Molecular Sciences, University of Delaware, Newark, Delaware 19710

\* Correspondence: Natalia.riveratorres@christianacare.org; Tel.: 1-302-623-4754

## **SUPPLEMENTAL MATERIAL**

# Experiment Goal: Asymmetric Insertion

|                  |      |                                                                           |    |                                |
|------------------|------|---------------------------------------------------------------------------|----|--------------------------------|
| Output Sequences | Ref. | TAGAGTCGACCTGCAGGCATGCAAGCTTGGCACTGGCCGTCGTTTACAACGTCGTGACTGGGAAAACCTGGCG |    | TTACAACGTCGTGACTGGGAAAACCTGGCG |
|                  |      | TAGAGTCGACCTGCAGGCATGCAAGCTTGGCACTGGCCGTCG                                | TT | TTACAACGTCGTGACTGGGAAAACCTGGCG |
|                  |      | TAGAGTCGACCTGCAGGCATGCAAGCTTGGCACTGGCCGTCG                                | TT | TTACAACGTCGTGACTGGGAAAACCTGGCG |
|                  |      | TAGAGTCGACCTGCAGGCATGCAAGCTTGGCACTGGCCGTCG                                | TT | TTACAACGTCGTGACTGGGAAAACCTGGCG |
|                  |      | TAGAGTCGACCTGCAGGCATGCAAGCTTGGCACTGGCCGTCG                                | TT | TTACAACGTCGTGACTGGGAAAACCTGGCG |
|                  |      | TAGAGTCGACCTGCAGGCATGCAAGCTTGGCACTGGCCGTCG                                | TT | TTACAACGTCGTGACTGGGAAAACCTGGCG |
|                  |      | TAGAGTCGACCTGCAGGCATGCAAGCTTGGCACTGGCCGTCG                                | TT | TTACAACGTCGTGACTGGGAAAACCTGGCG |
|                  |      | TAGAGTCGACCTGCAGGCATGCAAGCTTGGCACTGGCCGTCG                                | TT | TTACAACGTCGTGACTGGGAAAACCTGGCG |
|                  |      | TAGAGTCGACCTGCAGGCATGCAAGCTTGGCACTGGCCGTCG                                | TT | TTACAACGTCGTGACTGGGAAAACCTGGCG |
|                  |      | TAGAGTCGACCTGCAGGCATGCAAGCTTGGCACTGGCCGTCG                                | TT | TTACAACGTCGTGACTGGGAAAACCTGGCG |
|                  |      | TAGAGTCGACCTGCAGGCATGCAAGCTTGGCACTGGCCGTCG                                | TT | TTACAACGTCGTGACTGGGAAAACCTGGCG |
|                  |      | TAGAGTCGACCTGCAGGCATGCAAGCTTGGCACTGGCCGTCG                                | TT | TTACAACGTCGTGACTGGGAAAACCTGGCG |
|                  |      | TAGAGTCGACCTGCAGGCATGCAAGCTTGGCACTGGCCGTCG                                | TT | TTACAACGTCGTGACTGGGAAAACCTGGCG |
|                  |      | TAGAGTCGACCTGCAGGCATGCAAGCTTGGCACTGGCCGTCG                                | TT | TTACAACGTCGTGACTGGGAAAACCTGGCG |
|                  |      | TAGAGTCGACCTGCAGGCATGCAAGCTTGGCACTGGCCGTCG                                | TT | TTACAACGTCGTGACTGGGAAAACCTGGCG |

10/50 HDR-NS

Plasmid  
Oligo  
Mismatch  
De novo

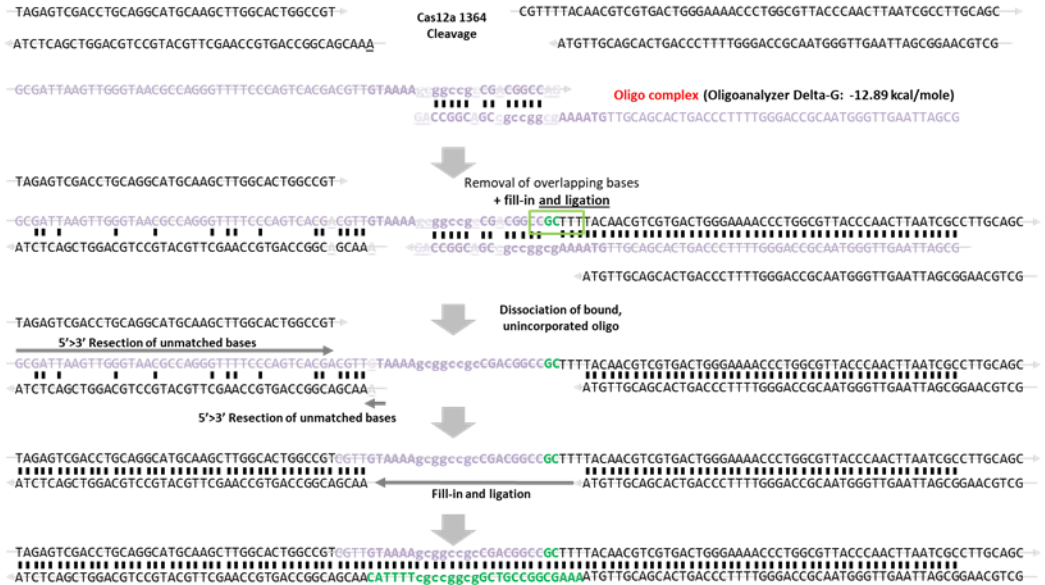

Supplemental Figure 1: Analysis and pathway of atypical repair resulting in ssODN dimer-driven repair outcomes.

# Sanger 1344-S/NS Reaction Parameters Comparison

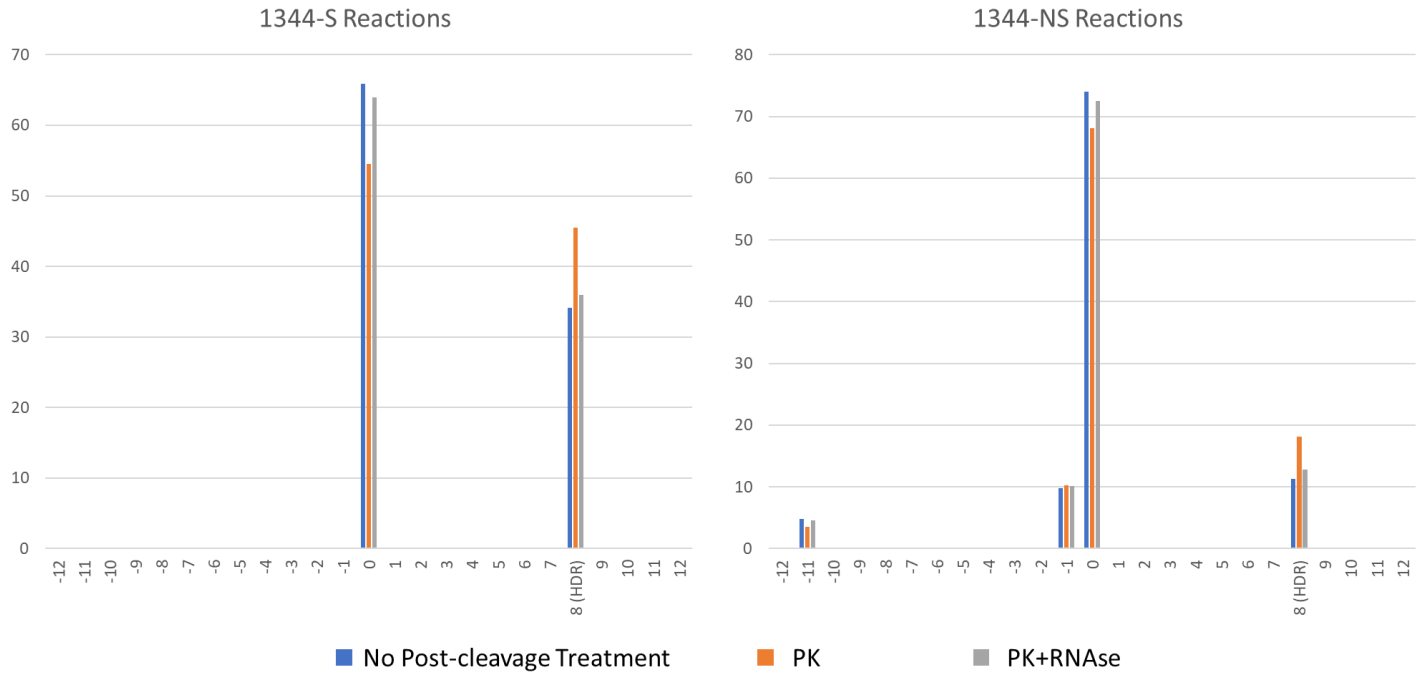

Supplemental Figure 2: Persistence of Strand Bias within *In Vitro* gene editing reactions in response to post-cleavage Cas12a degradation

### 1364 Microhomology Sites

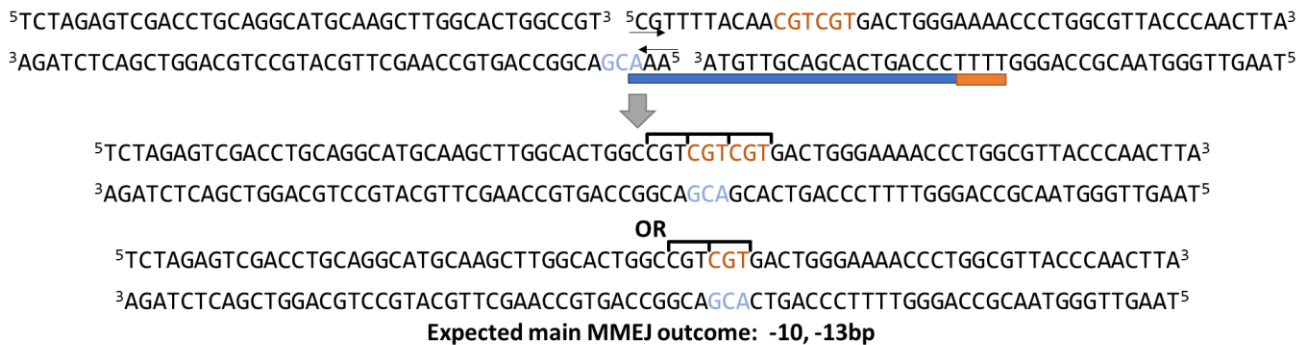

### 1344 Microhomology Sites

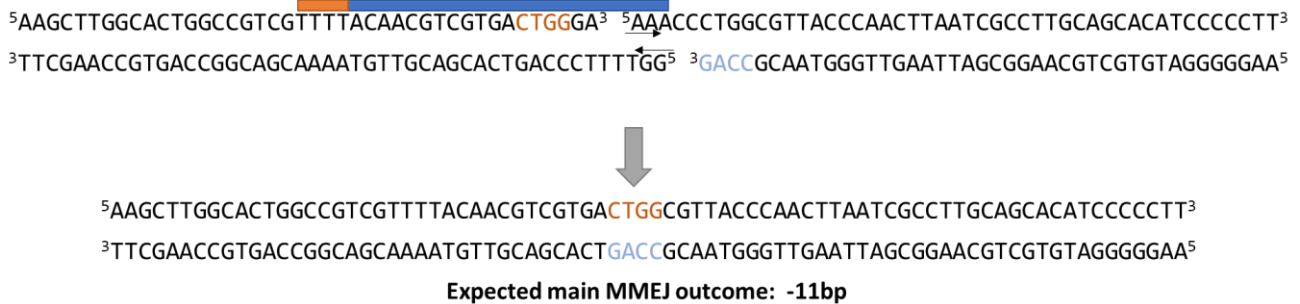

### 1228 Microhomology Sites

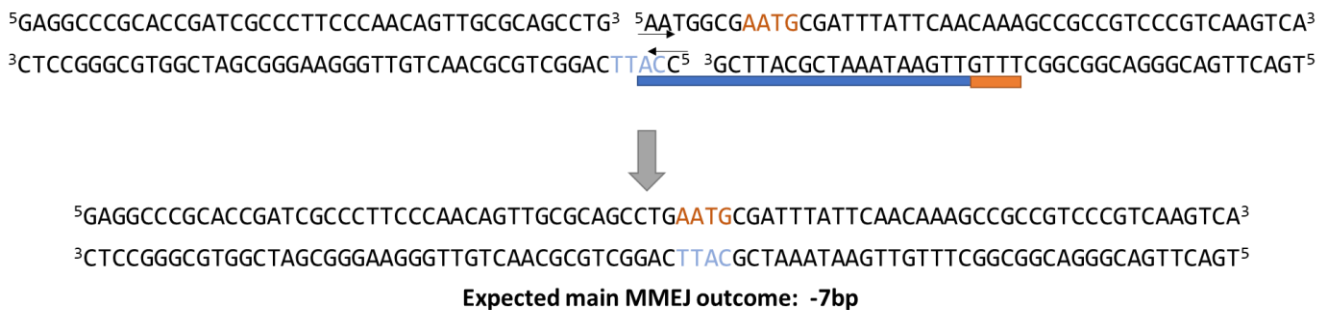

Supplementary Figure 3: Suggested patches of microhomology responsible or non-HDR indel events exhibited in Figures 3 and 4.
